# Supplementary material for: High-Dose Nitrate Supplementation Attenuates the Increased Blood Pressure Responses to Isometric Blood Flow Restriction Exercise in Healthy Males
Source: MDPI journal article supplement (doi:10.3390/nu14173645), 2022-09-03
Supplement: s1 [file s1]

**Table S1.** Systolic blood pressure (SBP), diastolic blood pressure (DBS), mean arterial pressure (MAP) responses at pre- and post-exercise rests, and during short isometric contraction and the sustained ischemic contraction. SBP: systolic blood pressure, DBP: diastolic blood pressure, MAP: mean arterial pressure, NIT: nitrate supplementation, PLA: placebo supplementation, \*:  $P < 0.05$ , #: ANOVA: the main effect of supplementation.

| BP (mmHg)                   | PLA          | NIT               |
|-----------------------------|--------------|-------------------|
| <b>Pre-exercise rest</b>    |              |                   |
| SBP                         | $127 \pm 6$  | $123 \pm 5^*$     |
| DBP                         | $66 \pm 7$   | $62 \pm 10^*$     |
| MAP                         | $86 \pm 5$   | $82 \pm 7^*$      |
| <b>Short contraction</b>    |              |                   |
| SBP                         | $142 \pm 11$ | $137 \pm 7^*$     |
| DBP                         | $78 \pm 4$   | $76 \pm 8$        |
| MAP                         | $99 \pm 5$   | $96 \pm 6^*$      |
| <b>Ischemic contraction</b> |              |                   |
| <b>160-180 s</b>            |              |                   |
| SBP                         | $180 \pm 13$ | $175 \pm 21^{\#}$ |
| DBP                         | $105 \pm 11$ | $99 \pm 17$       |
| MAP                         | $130 \pm 11$ | $124 \pm 16^{\#}$ |
| <b>120-140 s</b>            |              |                   |
| SBP                         | $174 \pm 15$ | $168 \pm 19^{\#}$ |
| DBP                         | $103 \pm 11$ | $98 \pm 13$       |
| MAP                         | $126 \pm 9$  | $122 \pm 12^{\#}$ |
| <b>60-80 s</b>              |              |                   |
| SBP                         | $161 \pm 14$ | $153 \pm 17^{\#}$ |
| DBP                         | $96 \pm 11$  | $92 \pm 13$       |
| MAP                         | $118 \pm 11$ | $112 \pm 12^{\#}$ |
| <b>0-20 s</b>               |              |                   |
| SBP                         | $145 \pm 12$ | $142 \pm 15^{\#}$ |
| DBP                         | $81 \pm 7$   | $80 \pm 10$       |
| MAP                         | $103 \pm 7$  | $101 \pm 10^{\#}$ |
| <b>Post-exercise rest</b>   |              |                   |
| SBP                         | $153 \pm 11$ | $139 \pm 11^*$    |
| DBP                         | $96 \pm 10$  | $93 \pm 14$       |
| MAP                         | $115 \pm 8$  | $109 \pm 13^*$    |
